# Supplementary material for: Assessing the Biological Safety of Atmospheric Cold Plasma Treated Wheat Using Cell and Insect Models
Source: MDPI journal article supplement (doi:10.3390/foods9070898), 2020-07-08
Supplement: s1 [file s1]

Figure S1

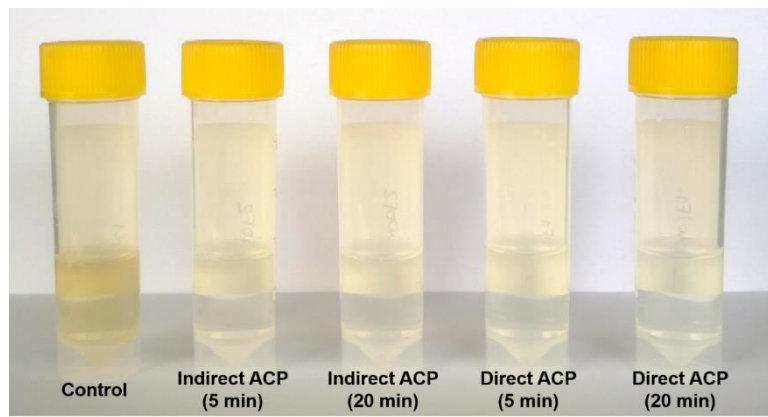

(a)

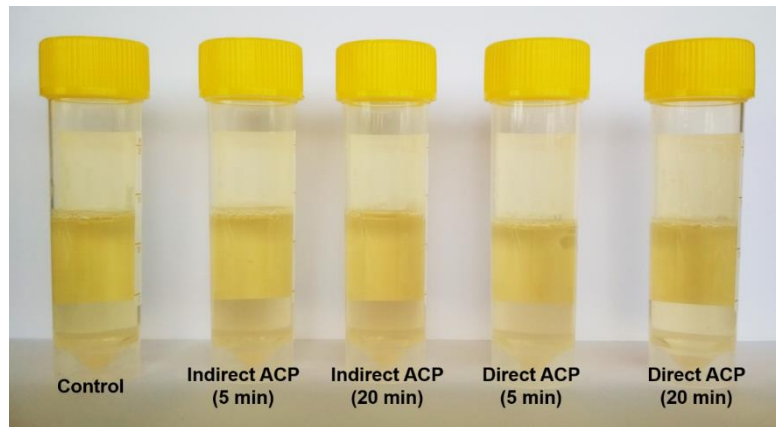

(b)

Figure S1. Change in the color of (a) WMM compared to (b) WGE after subjecting to ACP treatment.
